*Foxc1* controls cell fate decisions during transforming growth factor  $\beta$  induced epithelial to mesenchymal transition through the regulation of fibroblast growth factor receptor 1 expression.

**Alex Hopkins<sup>1</sup>, Mackenzie L. Coatham<sup>2,3</sup>, Fred B. Berry<sup>1,2\*</sup>**

From the Department of Surgery<sup>1</sup>, Medical Genetics<sup>2</sup> and Obstetrics and Gynecology<sup>3</sup>, University of Alberta, Edmonton AB Canada T6G 2E1

Running Title: *Foxc1* regulates *Fgfr1* expression in EMT

To whom correspondence should be addressed: Fred Berry, Department of Surgery, 3002D Li Ka Shing Centre, University of Alberta, Edmonton, AB, Canada. T6G 2E1, Telephone: (780)492-2517; E-mail: [fberry@ualberta.ca](mailto:fberry@ualberta.ca)

**Key words:** Transcription factor, epithelial-mesenchymal transition, metastasis, gene regulation, fibroblast growth factor receptor

## ABSTRACT

Epithelial to mesenchymal transition (EMT) is an important physiological process that drives tissue formation during development but also contributes to disease pathogenesis including fibrosis and cancer metastasis. The forkhead box transcription factor gene *FOXC1* is an important developmental regulator in the generation of mesenchymal cells necessary in the formation of the anterior segment of the eye, the craniofacial skeleton and the meninges. Recently elevated expression of *FOXC1* has been detected in several metastatic cancers that have undergone EMT events. We sought to determine the role of *FOXC1* in the initiation of EMT events using NMuMG cells treated with TGF $\beta$ 1. We found that although *Foxc1* expression was increased following TGF $\beta$ 1 induced EMT, *Foxc1* was not required for this induction. Instead we propose that *Foxc1* is required for the specification of the mesenchyme cell type, promoting an activated fibroblast phenotype over a myofibroblast phenotype following the initiation of EMT. This cells type specification was achieved through the regulation of Fibroblast growth factor (*Fgfr*) 1 expression. Using an RNA sequencing approach, we determined that levels of *Fgfr1* normally activated upon TGF $\beta$ 1 treatment were reduced in *Foxc1*-knockdown cells. Through chromatin immunoprecipitation experiments we determined that *FOXC1* could bind to an *Fgfr1* upstream regulatory region. Furthermore, expression of the myofibroblast marker  $\alpha$ -smooth muscle actin ( $\alpha$ SMA) was elevated in *Foxc1* knockdown cells. Finally we determined that FGF2 mediated three dimensional migratory ability was greatly impaired in *Foxc1*-knockdown cells. Together these results define a role for *Foxc1* in specifying a mesenchymal cell type following TGF $\beta$ 1 mediated EMT events.

## INTRODUCTION

Epithelial to mesenchymal transition (EMT) is a biologically important process whereby epithelial cells alter their morphology and

adopt properties of mesenchymal cells (1-4). EMT was originally observed and described as a transient trans-differentiation where cells from an epithelium lose characteristic marks such as E-Cadherin as well as their epithelial sheet morphology and gain mesenchymal properties such as N-Cadherin expression and increased migratory properties (1). During development EMT, is a key process in generating tissues during gastrulation, somitogenesis and neural crest cell formation (5). EMT has also been identified as a biological step in the progression of organ fibrosis and wound healing in adult tissues (6,7). Finally EMT events are thought to drive metastasis in a number of cancers including breast basal cell carcinoma, hepatocellular carcinoma and pancreatic tumours (8-10).

A key component to EMT is the characteristic decrease in E-Cadherin levels resulting in the loss of epithelial adherens junctions. In concert with the loss of E-Cadherin, progression of EMT and up regulation of the mesenchymal marker N-Cadherin results in what is called the "cadherin switch"(11). Epithelial cells alter cadherins to lose the resultant junctions, reorganize their cytoskeleton, and lose apical-basal polarity in favour of the front-rear polarity of mesenchymal cells (2,12). Cells which have up-regulated levels of N-Cadherin also up-regulate the intermediate filament Vimentin that is required for cytoskeletal re-arrangement and adoption of the spindle-like cell morphology. Multiple transcription factors including *Snail1*, *Twist1* and *ZEB1* and 2 have been demonstrated to directly down-regulate E-Cadherin expression and induce EMT events (8,13-15).

Another key factor in the initiation of EMT is transforming growth factor beta 1 (TGF- $\beta$ 1) (16,17) (2). These secreted factors are members of a larger growth factor family, which includes the well-identified morphogens TGF- $\beta$ , bone morphogenetic proteins and the activin/inhibin subfamily. These factors act physiologically as paracrine or autocrine signals and are known to contribute to embryonic development, tissue homeostasis, as well as tumor

suppression and metastasis (2). TGF- $\beta$ 1 acts primarily through the binding to type II TGF- $\beta$  receptors, which in turn phosphorylate and activate type I receptors. These activated type I receptors then initiate a signal transduction cascade resulting in the phosphorylation of SMAD2 or SMAD3 proteins. Once phosphorylated, SMAD2/3 protein can associate with SMAD4 and translocate to the nucleus and regulate gene expression. In response to TGF- $\beta$ 1-SMAD2/3 signalling, expression of many transcription factor genes that initiate EMT such as *Snail1* and *Zeb1/2* are rapidly induced (2,16).

The forkhead box transcription factor FOXC1 is required for the development and formation of tissues derived from neural crest and paraxial mesenchyme including the anterior segment of the eye, the meninges, the axial skeleton and craniofacial skeleton (18-21). As much of the formation of these tissues is driven by EMT events, it stands to reason that FOXC1 may function in EMT. More recently, elevated expression of *FOXC1* was detected in basal cell-like breast carcinomas and other metastatic cancers that have undergone EMT (22-28). Furthermore reduction of *FOXC1* expression in some cancer cell lines can lead to a reversal of a mesenchymal phenotype (23). However in many of these experiments, the cells had undergone EMT events prior alterations in *FOXC1* levels. Thus little information is known regarding the role for FOXC1 in response to physiological induction of EMT events. To assess this question, we utilized the TGF- $\beta$ 1 induction of EMT in the mouse mammary epithelial cell line NMuMG to investigate the role of *Foxc1* in EMT events. We found that expression of *Foxc1* was indeed induced by TGF- $\beta$ 1 treatment. However, loss of *Foxc1* function through RNA interference did not prevent the induction of EMT events in response to TGF- $\beta$ 1. Instead we found that *Foxc1* regulated the specificity of the mesenchymal cell phenotype. Loss of *Foxc1* expression led to a reduction of Fibroblast Growth Factor receptor (FGFR) 1 expression and promoted a less invasive myofibroblast mesenchymal cell phenotype.

## RESULTS

To determine whether *Foxc1* expression was elevated during EMT, we utilized the well-established NMuMG cell model. These epithelial cells will undergo a transition to a mesenchymal phenotype in response to the EMT inducer, TGF- $\beta$ 1. We detected changes in cytoskeletal architecture characteristic of EMT in NMuMG cells after treatment with TGF- $\beta$ 1 (5 ng/ml) for 24 hours (Fig 1A). *Foxc1* mRNA was elevated after 24 and 48 hours of induction (Fig 1B). This change expression was also accompanied by an induction of the mesenchymal cells markers *Snail1*, *Vimentin* and *Cdh2* (*N-cadherin*) expression as well as a reduction in the epithelial cells marker *Cdh1* (*E-cadherin*) mRNA levels. Expression of *Foxc1* mRNA was unchanged at 4 h and 12 h of TGF- $\beta$ 1 treatment. In contrast, *Snail1* mRNA levels were rapidly elevated 4 h post TGF- $\beta$ 1 treatment. Over time, levels of *Foxc1* mRNA decreased in untreated cells, whereas *E-cadherin* levels increased. Given the increase in *Foxc1* mRNA levels following TGF- $\beta$ 1-induced EMT we asked whether decreasing *Foxc1* levels would prevent EMT induction. To test this idea, we transiently transfected NMuMG cells with *Foxc1* siRNA or stably transduced cells with *Foxc1* shRNAs resulting in a 50% and 80% reduction of *Foxc1* mRNA levels, respectively (Supplemental Fig 1A, Figure 2A). Very little FOXC1 protein was detected in the stable expressing *Foxc1* shRNA cells (Fig 2B). As a control, we transduced cells with a vector expressing shRNA targeting EGFP. When *Foxc1* knock down cells were treated with TGF- $\beta$ 1 for 24 hours, we detected no differences in expression profiles characteristic of EMT. Levels of *Snail1*, *Vimentin* and *N-Cadherin* mRNA were increased in both control (shEGFP) and *Foxc1* (shFOXC1) knockdown cells following TGF- $\beta$ 1 treatment (Figs 2C and Supplemental S1). *E-cadherin* mRNA levels decreased following TGF- $\beta$ 1 in both the shEGFP and shFOXC1 NMuMG knockdown cells. We examined whether the morphological phenotype characteristic of EMT was affected in response to reduced *Foxc1* levels. In control and *Foxc1* knock down cells, E-Cadherin protein was

distributed at the cell membrane in a manner characteristic of epithelial cells. We determined the distribution of actin through phalloidin-488 staining. In untreated cells, the actin distribution overlapped that of the E-Cadherin immunofluorescence in both control and *Foxc1* knockdown cells (Fig 3 and Supplemental Fig 3). Upon TGF- $\beta$ 1 treatment, the intensity of E-cadherin staining was greatly reduced in both control and *Foxc1* knockdown cells. Moreover, we detected the redistribution of actin in to stress fibres characteristic of EMT following TGF- $\beta$ 1 treatment in both control and *Foxc1* knockdown cells (Fig 3 and Fig S3). Together these data suggest that although *Foxc1* mRNA expression is elevated following TGF- $\beta$ -induced EMT, reducing *Foxc1* levels appears to have no effect on the induction of this cellular event.

Given that *Foxc1* expression was induced in response to TGF- $\beta$ 1 induced EMT and the elevated expression in mesenchymal cells suggests that *Foxc1* may play other roles in EMT, apart from its induction. To ascertain what that role for *Foxc1* may be we sought to determine what genes were differentially expressed in shFOXC1 vs. shEGFP cells treated with TGF- $\beta$ 1. Three independent RNA samples were analysed by RNA-seq. From this analysis, 660 genes were differentially regulated (451 down regulated; 209 up-regulated) with a false discovery rate of 0.01 (Table 2 and 3). We next validated whether shFOXC1 knockdown did indeed lead to changes in gene expression by qRT-PCR from independent biological replicates treated with and without TGF- $\beta$ 1. All genes we analysed were differentially expressed in shFOXC1 cells treated with TGF- $\beta$ 1 compared with control shEGFP cells (Fig 4 and 5; and data not shown). Since the RNA-seq experiments only compared expression between shEGFP and shFOXC1 cells treated with TGF- $\beta$ 1, we did not know whether the expression of the genes themselves was altered in response to TGF- $\beta$ 1. Many of the genes that we identified (*Lefty1*, *Jam2*, *Tead2* and *Slc4a11*) were induced by TGF- $\beta$ 1 and that activation was reduced in shFOXC1 cells (Fig 4). Of note, we did not detect any change in expression of known inducers or

markers of EMT (such as *Snail1*, *Slug*, *Zeb*, *E-Cadherin* or *N-Cadherin*), nor did we identify any changes in *Foxc2* expression (a known regulator of EMT; (10)) in our RNA-seq analysis.

From the RNA-seq data we noted a decrease in expression of FGFR1 mRNA and increase in expression of  $\alpha$ -smooth muscle actin ( $\alpha$ SMA) in our TGF $\beta$ 1 treated shFOXC1 cells (Fig 5, Tables 2 and 3). It has been demonstrated that TGF- $\beta$ 1 treatment can result in an FGFR receptor switch whereby expression of *Fgfr2* is down regulated and *Fgfr1* expression is elevated (29). This receptor switch occurs as cells transition from the epithelial to mesenchymal state. Moreover, FGFR1 function is needed for mesenchymal cells to further differentiate into active migratory mesenchymal cells. In the absence of FGFR1 signalling, these cells will differentiate into myofibroblast cells (noted by elevated  $\alpha$ SMA expression levels). Indeed we observed that the increase in *Fgfr1* expression was reduced in TGF- $\beta$ 1 treated shFOXC1 cells compared with shEGFP control cells, while levels of  $\alpha$ SMA were elevated in the shFOXC1 in response to TGF- $\beta$ 1. We also noted that *Fgfr2* expression was down regulated by TGF- $\beta$ 1 in both shEGFP and shFOXC1 cells. Next we identified a region approximately 4 kb upstream of the first exon of the mouse *Fgfr1* gene that was conserved with the human *FGFR1* gene and contained a putative FOXC1 DNA-binding site (GTAAATAA; (30,31)). Using chromatin immunoprecipitation (ChIP) analysis we confirmed that FOXC1 binding to this site was enriched compared to a non-regulatory region in the *Fgfr1* coding sequence (Fig 5). Together these data indicate the *Foxc1* acts to directly regulate expression of *Fgfr1* in response to TGF- $\beta$ 1 induced EMT events.

FGFR2 to FGFR1 receptor switching can increase the cells affinity for FGF2 ligand and can promote the differentiation of mesenchymal cells to an invasive fibroblast state (29). In the absence of FGFR1 activity these mesenchymal cells adopt a less migratory myofibroblast phenotype. We wished to test whether reduction in *Foxc1* levels promoted the myofibroblast phenotype and thus a less migratory cell type in response to FGF2

treatment. Untreated shEGFP and shFOXC1 cells were treated with TGF- $\beta$ 1 and FGF2 were seeded onto transwell membranes for cell invasion assays. As indicated in Figure 6, very few untreated shEGFP or shFOXC1 cells migrated through the membrane while TGF $\beta$ 1 and FGF2 treated shEGFP cells displayed a robust invasive phenotype (Fig 6). Thus reducing *Foxc1* levels resulted in a marked decrease in TGF- $\beta$ -FGF2 induced invasive potential in NMuMG cells.

## DISCUSSION

Elevated expression of *FOXC1* has been attributed to regulation of EMT in many human cancer cells (22-28). However the exact role for FOXC1 in EMT events has yet to be elucidated. In many cases it has been reported that FOXC1 induces EMT possibly through the regulation of *SNAIL1* expression (32). We investigated role of *Foxc1* in the TGF- $\beta$ 1 mediated EMT in non-transformed mouse NMuMG cells. While we did observe an activation of *Foxc1* mRNA expression in response to TGF- $\beta$ 1 induced EMT, this increase in *Foxc1* expression occurred 12-24 hours post treatment, well after the induction *Snail1* mRNA. We also observed that EMT events occurred when *Foxc1* levels were reduced by siRNA or shRNA following treatment with TGF- $\beta$ 1. Levels of *Snail1*, *N-Cadherin* and *Vimentin* mRNA were still upregulated in response to TGF- $\beta$ 1 in *Foxc1* knockdown cells. As well *E-cadherin* and *Fgfr2* expression were concomitantly down regulated in TGF- $\beta$ 1 in *Foxc1* knockdown cells. Finally the actin cytoskeleton reorganized from a cortical distribution in untreated epithelial cells to a form actin stress fibres characteristic of EMT events. Together these findings suggest that in mouse epithelial cells FOXC1 does not function in the initiation of EMT events.

Our results indicating that FOXC1 is not required for the induction of EMT events in response to TGF- $\beta$ 1 treatment are in contrast to other findings suggest a role for FOXC1 as an initiator of this process. These differences may reflect the cell types used in each study. Our experiments focused on the induction of EMT through physiological means, notably TGF- $\beta$ 1

treatment, in an untransformed epithelial cell. Whereas many of other studies reduced *FOXC1* by siRNA in cancer cells lines that had undergone EMT and demonstrated a loss of expression of mesenchymal markers. Our data indicate that *Foxc1* may function in the specification of the mesenchymal cell type but does rule out a role in the maintenance of mesenchymal properties. The reduction of FOXC1 expression in cancer cells may lead a reversion back to the epithelial state as low FOXC1 levels may be insufficient to maintain the mesenchymal cell phenotype. We also observed that *Foxc1* knock down led to elevated *Fgfr2* expression. Thus the reversion of the mesenchymal phenotype observed when FOXC1 expression is knocked down in cancer cell lines may result from altering the abundance of FGFR2 to FGFR1 ratios to favour the epithelial state. Finally enforced expression of FOXC1 in human MCF10A breast epithelial cells was not sufficient to activate expression of mesenchymal cells markers such as *SNAIL1*, *TWIST* and *VIMENTIN*, nor sufficient to down-regulate *E-CADHERIN* levels (33).

To ascertain the functional roles for *Foxc1* in EMT events, changes in gene expression in cells with reduced *Foxc1* levels treated with TGF- $\beta$ 1 were compared to cells with unaltered *Foxc1* expression. Using an unbiased screen we identified a number of genes that displayed differential expression when *Foxc1* levels were reduced. In the RNA-seq analyses we compared expression between shEGFP and shFOXC1 cells treated with TGF- $\beta$ 1, and identified over 600 genes with either reduced or elevated expression in shFOXC1 compared to the shEGFP control (Table 2 and 3). We subsequently determined whether expression of these genes was altered in response to TGF- $\beta$ 1 treatment and whether that response was altered in shFOXC1 cells. We identified that *Fgfr1*, *Tead2*, *Jam2* and *Slc4a11* expression to be upregulated in response to TGF- $\beta$ 1 treatment and this induction was attenuated when *Foxc1* levels were reduced. Given that *Foxc1* expression was also activated by TGF- $\beta$ 1 raises the notion that these genes may be under the regulatory control of FOXC1 or may participate in



common pathways. *Tead2* regulates the localization of Hippo pathway factors TAZ and YAP to promote TGF- $\beta$ 1 induced EMT in NMuMG cells (34). *Jam2* encodes for a Junction adhesion molecule is located and is located between tight junctions of endothelial cells (35). A role for this gene in EMT has yet to be elucidated.

Most notably from our RNA-seq experiments, we observed that expression of *Fgfr1* levels were reduced and expression of  $\alpha$ SMA were elevated in shFOXC1 cells treated with TGF- $\beta$ 1. When cells undergo TGF- $\beta$ 1 induced EMT, *Fgfr* genes undergo a receptor switch (29). In the epithelial cell state, levels of *Fgfr2* are elevated compared to *Fgfr1* and subsequently this ratio reverses with *Fgfr1* being the predominant receptor type expressed in response to EMT induction. Each FGFR has varying affinity for distinct FGF ligands. In particular FGFR1 binds to FGF2 at higher affinity than FGFR2, thus in response to FGF2 stimulation mesenchymal cells can further differentiate into either myofibroblasts or activated fibroblasts (29). Myofibroblasts are characterised by elevated expression of  $\alpha$ SMA and a reduced migratory phenotype; whereas activated fibroblasts exhibit aggressive migratory and invasive properties and low levels of  $\alpha$ SMA expression. Our data suggest that FOXC1 regulates this receptor switch from FGFR2 to FGFR1 through the activation of *Fgfr1* expression in response to TGF- $\beta$ 1. In *Foxc1*-knock down NMuMG cells, we observed reduced expression of *Fgfr1* and elevated levels of  $\alpha$ SMA when cells were treated with TGF- $\beta$ 1. We also detected binding of the *Fgfr1* promoter by FOXC1 through ChIP assays. Furthermore these cells displayed a reduced three dimensional migratory phenotype in response to FGF2 treatment. Thus we propose a function for FOXC1 in mesenchymal cell specification towards a highly invasive and migratory activated fibroblast-like cell type during EMT events.

Elevated expression levels of *FGFR1* are characteristic of many aggressive metastatic cancers that have undergone EMT (36-38). Basal like cell breast cancers display high levels of

*FGFR1* along with elevated *FOXC1* expression (39,40). Induced *FGFR1* overexpression can promote EMT phenotype in prostate adenocarcinoma cells (41). In addition to cancer metastasis, EMT is an important contributor to tissue fibrosis. In kidney cells, activation of FGF2 signalling can promote EMT and fibrogenesis (42). Furthermore therapeutic strategies to target FGFR1 activities look promising in the treatment of certain types of cancers and the inhibition of FGFR1 activity can promote the reversion of the mesenchymal phenotype back to the epithelial cells state (43,44).

In summary, the elevated expression of FOXC1 in many cells that have undergone EMT has implicated FOXC1 in this cellular process. However, a clear role for FOXC1 in regulating EMT has yet to be determined. We provide evidence FOXC1 is not required for initiation of EMT events but rather participates in the specification of mesenchymal cell phenotype through regulation of FGF receptor switching from FGFR2 to FGFR1 in response to TGF- $\beta$ 1-induced EMT. Elevated expression of FOXC1 has been proposed as a prognostic biomarker in many aggressive cancers. Many of these cancers have elevated FGFR1 levels themselves, thus treatments based on FGFR1 inhibitors may prove to be beneficial in FOXC1-elevated cancers.

## EXPERIMENTAL PROCEDURES

*Cell Culture and Growth Factor Treatment-* Namru murine mammary gland NMuMG cells (ATCC) were cultured in Dulbecco modified Eagle medium and 10% fetal bovine serum (FBS) at 37°C and 5% carbon dioxide. The cells were sub-cultured twice weekly once they reached approximately 80% confluence in the flasks. For experiments using TGF- $\beta$ 1 stimulation,  $2 \times 10^5$  cells were plated in a 35mm plate and incubated for 1 day. TGF- $\beta$ 1 (R&D Systems) was added to the media up to a final concentration of 5 ng/ml.

*Quantitative reverse transcriptase (qRT) PCR-RNA* was harvested from NMuMG cells RNeasy mini kit (Qiagen) and quantified by

spectrophotometry (Nano-Drop 1000). 500 ng of total RNA from each experimental group was used to generate cDNAs from a reverse transcription reaction with random primers (Qiagen). Quantitative real time PCR was performed on a 1:25 dilution of the cDNA samples using a Kapa SYBR Fast qPCR master mix (Kapa Biosystems) and reactions run on a Bio-Rad CFX-96 touch thermocycler. *Glyceraldehyde 3-phosphate dehydrogenase* (Gapdh) and  $\beta$ -actin and *Hypoxanthine-guanine phosphoribosyltransferase* (HPRT) were used as internal controls. Primer sequences are listed in Table 1. Statistical analysis was conducted using Bio-Rad CFX-Manager Software (Version 3.0 1215.0601)

**RNA Interference-Stable shRNA** cells lines were created by transducing NMuMG cells with lentiviral vectors containing shRNAs targeting mouse *Foxc1* or EGFP as described previously (45). The *Foxc1* shRNA (TRCN0000085449) and the EGFP shRNA were obtained from The RNAi Consortium and has been demonstrated to reduce *Foxc1* levels in mouse embryonic stem cells (46). To establish stable cell lines, NMuMG cells were selected with 2  $\mu$ g/ml of puromycin for two weeks. Approximately 100 colonies were pooled and monitored for *Foxc1* expression. *Foxc1* shRNA viral transduction was performed to generate two independent *Foxc1* knock down cells lines (shFOXC1 v1 and shFOXC1 v2). Both lines behaved in a similar manner and data presented are indicative of shFoxc1 v1 cells. Small interfering double-stranded RNAs with sequences complimentary to the *Foxc1* transcript were obtained from Dharmacon (siGenome *Foxc1*). Cells were seeded at a density of  $2 \times 10^5$  cells per well in a 6 well plate. siRNA for *Foxc1* and control non-specific siRNAs were transfected 24 hours later with Dharmafect-1 transfection reagent and TGF- $\beta$ 1 (5ng/ml) was added to the cells 24 hours post transfection. RNA was harvested for qRT-PCR analysis 24 hour after TGF- $\beta$ 1 treatment.

**Immunoblot Analysis**-Cells were grown in TGF- $\beta$ 1 for 2 days and protein was extracted for immunoblot analysis as described previously

(45,47). Membranes were incubated with goat-anti FOXC1 (C18, sc-21396 Lot # J0206; Santa Cruz Biotechnology) at a concentration 1:100 overnight at 4°C or with mouse anti  $\beta$ -Tubulin (G8, sc-55529, Lot # E2412; Santa Cruz Biotechnology) at 1:5000. Blots were visualized on a LI-COR Odyssey imager using IR-DYE700 donkey-anti-goat IgG and IR-DYE800 donkey-anti-mouse IgG secondary antibodies.

**Immunofluorescence**-NMuMG (shFOXC1 and shEGFP) cells were cultured at  $2 \times 10^5$  per well on sterile coverslip. The next day cells were treated with TGF $\beta$ 1 (5 ng/ml) for 24 hours. Cells were fixed for 20 minutes in 4% formaldehyde, followed washes in PBS+ 0.05% TritonX-100 (PBS-X) and blocked with 5% BSA for 15 minutes. Coverslips were incubated with the following primary antibody for 1 hour: E-Cadherin (Cell Signaling Technology (24E10); 1:100). Cells were washed with PBS-X and then incubated with secondary antibodies. DAPI was added to visualize nuclei and phalloidin-488 to detect polymerized actin. Coverslips were mounted onto glass slides with Prolong Gold mounting medium (Thermo Fisher). Slides were visualized at room temperature on Leica DRME fluorescent microscope using a 40X objective. Images were captured and pseudo-coloured using Northern Eclipse Imaging software. Micrographs were prepared using CorelDraw 16.

**RNA sequencing**-RNA was isolated from shFOXC1 or shEGFP treated with TGF- $\beta$ 1 (5 ng/ml) for 24 hours from three independent treatment procedures. Fifteen micrograms of RNA was used for library construction and sequencing on an Illumina HiSeq2500. Sequencing and bioinformatic analysis was performed by Otogenics (Norcross, GA). Data sets were mapped against mouse reference genome (mm10) with tophat and differential expression analysis was conducted using cufflinks and cuffdiff. A false discovery rate of 0.01 was used to identify differences in gene expression between shFOXC1 and shEGFP samples.

**Chromatin immunoprecipitation (ChIP)-** ChIP was performed as described previously (45,48) with the following modifications. NMuMG cells were treated with TGF- $\beta$ 1 for 24 hours. Chromatin was sheared on ice for 15 cycles of 30 seconds at 30% intensity on a Branson Sonifier with 1 minute intervals between sonication cycles. Sheared chromatin was then incubated overnight with 5  $\mu$ g anti-Foxc1 or IgG. The mouse *Fgfr1* upstream regulatory region was amplified using the following primers: FGFR1 ChIP 1F 5'-TGT CCT CCG TCT CCG AGA AT-3'; FGFR1 ChIP R-5'-GAG GGA GGG GCA GAA TCT TG-3'. Primers targeting the *Fgfr1* coding region (Table 1) were used as a negative control. ChIP assays were performed from three independent chromatin preparations.

**Invasion Assays-** Cells were seeded in a 6-well plate at  $2 \times 10^5$  cells per well and treated with 5 ng/ml TGF- $\beta$ 1 and 30 ng/ml FGF2 (R&D

Systems) along with 100  $\mu$ g/ml heparin for 48 hours. Cells that did not receive growth factor treatment were used as controls. After treatment, cells were resuspended in serum free media and  $2.5 \times 10^4$  cells were placed into growth factor reduced Matrigel invasion chambers (Corning). Each insert was placed into a 24 well plate containing 0.75 ml DMEM + 10% FBS. Cells were incubated for 24 hours. Cells were removed from the topside of the insert with a cotton swab and the membranes were fixed in 4% paraformaldehyde and stained with Haematoxylin and Eosin. Each transwell assay contained three replicates per experimental variable and was performed twice.

**Statistical Analysis-** For ChIP and invasion assays, one way ANOVA was performed with SigmaPlot (Systat Software Inc.) Version 13 (13.0.0.83.)

**Acknowledgements:** We like to thank R. Lavy for critically reading this manuscript. Funding for this research was provided by grants awarded to F.B.B. from the Canadian Institutes for Health Research and from the Edmonton Civic Employees Charitable Trust. M.C. is a recipient of a studentship from the Graduate Program in Maternal and Child Health. F.B.B. hold the Shriners Hospital for Children Endowed Chair in Pediatric Scoliosis Research.

**Conflict of Interest:** The authors declare that they have no conflicts of interest with the contents of this article.

**Author Contributions:** A.H. wrote the manuscript, designed, performed and analysed experiments. M.C. performed and analysed experiments. F.B.B. wrote the manuscript, conceived, performed and analysed experiments.



## REFERENCES

1. Hay, E. D. (2005) The mesenchymal cell, its role in the embryo, and the remarkable signaling mechanisms that create it. *Developmental Dynamics* **233**, 706-720
2. Lamouille, S., Xu, J., and Derynck, R. (2014) Molecular mechanisms of epithelial-mesenchymal transition. *Nat Rev Mol Cell Biol* **15**, 178-196
3. Mani, S. A., Guo, W., Liao, M. J., Eaton, E. N., Ayyanan, A., Zhou, A. Y., Brooks, M., Reinhard, F., Zhang, C. C., Shipitsin, M., Campbell, L. L., Polyak, K., Briskin, C., Yang, J., and Weinberg, R. A. (2008) The epithelial-mesenchymal transition generates cells with properties of stem cells. *Cell* **133**, 704-715
4. Thiery, J. P., Acloque, H., Huang, R. Y., and Nieto, M. A. (2009) Epithelial-mesenchymal transitions in development and disease. *Cell* **139**, 871-890
5. Nakaya, Y., and Sheng, G. (2013) EMT in developmental morphogenesis. *Cancer Lett* **341**, 9-15
6. Kalluri, R., and Neilson, E. G. (2003) Epithelial-mesenchymal transition and its implications for fibrosis. *J Clin Invest* **112**, 1776-1784
7. Zeisberg, M., and Kalluri, R. (2013) Cellular mechanisms of tissue fibrosis. 1. Common and organ-specific mechanisms associated with tissue fibrosis. *Am J Physiol Cell Physiol* **304**, C216-225
8. Yook, J. I., Li, X. Y., Ota, I., Hu, C., Kim, H. S., Kim, N. H., Cha, S. Y., Ryu, J. K., Choi, Y. J., Kim, J., Fearon, E. R., and Weiss, S. J. (2006) A Wnt-Axin2-GSK3beta cascade regulates Snail1 activity in breast cancer cells. *Nat Cell Biol* **8**, 1398-1406
9. Scheel, C., and Weinberg, R. A. (2012) Cancer stem cells and epithelial-mesenchymal transition: concepts and molecular links. *Semin Cancer Biol* **22**, 396-403
10. Taube, J. H., Herschkowitz, J. I., Komurov, K., Zhou, A. Y., Gupta, S., Yang, J., Hartwell, K., Onder, T. T., Gupta, P. B., Evans, K. W., Hollier, B. G., Ram, P. T., Lander, E. S., Rosen, J. M., Weinberg, R. A., and Mani, S. A. (2010) Core epithelial-to-mesenchymal transition interactome gene-expression signature is associated with claudin-low and metaplastic breast cancer subtypes. *Proc Natl Acad Sci U S A* **107**, 15449-15454
11. Wheelock, M. J., Shintani, Y., Maeda, M., Fukumoto, Y., and Johnson, K. R. (2008) Cadherin switching. *J Cell Sci* **121**, 727-735
12. Huang, R. Y., Guilford, P., and Thiery, J. P. (2012) Early events in cell adhesion and polarity during epithelial-mesenchymal transition. *J Cell Sci* **125**, 4417-4422
13. Vincent, T., Neve, E. P., Johnson, J. R., Kukalev, A., Rojo, F., Albanell, J., Pietras, K., Virtanen, I., Philipson, L., Leopold, P. L., Crystal, R. G., de Herreros, A. G., Moustakas, A., Pettersson, R. F., and Fuxe, J. (2009) A SNAIL1-SMAD3/4 transcriptional repressor complex promotes TGF-beta mediated epithelial-mesenchymal transition. *Nat Cell Biol* **11**, 943-950
14. Aigner, K., Dampier, B., Descovich, L., Mikula, M., Sultan, A., Schreiber, M., Mikulits, W., Brabletz, T., Strand, D., Obrist, P., Sommergruber, W., Schweifer, N., Wernitznig, A., Beug, H., Foisner, R., and Eger, A. (2007) The transcription factor ZEB1 (deltaEF1) promotes tumour cell dedifferentiation by repressing master regulators of epithelial polarity. *Oncogene* **26**, 6979-6988
15. Yang, J., Mani, S. A., Donaher, J. L., Ramaswamy, S., Itzykson, R. A., Come, C., Savagner, P., Gitelman, I., Richardson, A., and Weinberg, R. A. (2004) Twist, a master regulator of morphogenesis, plays an essential role in tumor metastasis. *Cell* **117**, 927-939
16. Miettinen, P. J., Ebner, R., Lopez, A. R., and Derynck, R. (1994) TGF-beta induced transdifferentiation of mammary epithelial cells to mesenchymal cells: involvement of type I receptors. *J Cell Biol* **127**, 2021-2036
17. Muraoka, R. S., Dumont, N., Ritter, C. A., Dugger, T. C., Brantley, D. M., Chen, J., Easterly, E., Roebuck, L. R., Ryan, S., Gotwals, P. J., Kotliansky, V., and Arteaga, C. L. (2002) Blockade of

- TGF-beta inhibits mammary tumor cell viability, migration, and metastases. *J Clin Invest* **109**, 1551-1559
18. Mears, A. J., Jordan, T., Mirzayans, F., Dubois, S., Kume, T., Parlee, M., Ritch, R., Koop, B., Kuo, W. L., Collins, C., Marshall, J., Gould, D. B., Pearce, W., Carlsson, P., Enerback, S., Morissette, J., Bhattacharya, S., Hogan, B., Raymond, V., and Walter, M. A. (1998) Mutations of the forkhead/winged-helix gene, FKHL7, in patients with Axenfeld-Rieger anomaly. *Am J Hum Genet* **63**, 1316-1328
19. Kume, T., Deng, K. Y., Winfrey, V., Gould, D. B., Walter, M. A., and Hogan, B. L. (1998) The forkhead/winged helix gene Mf1 is disrupted in the pleiotropic mouse mutation congenital hydrocephalus. *Cell* **93**, 985-996
20. Rice, R., Rice, D. P., Olsen, B. R., and Thesleff, I. (2003) Progression of calvarial bone development requires Foxc1 regulation of Msx2 and Alx4. *Dev Biol* **262**, 75-87
21. French, C. R., Seshadri, S., Destefano, A. L., Fornage, M., Arnold, C. R., Gage, P. J., Skarie, J. M., Dobyns, W. B., Millen, K. J., Liu, T., Dietz, W., Kume, T., Hofker, M., Emery, D. J., Childs, S. J., Waskiewicz, A. J., and Lehmann, O. J. (2014) Mutation of FOXC1 and PITX2 induces cerebral small-vessel disease. *J Clin Invest*
22. Du, J., Li, L., Ou, Z., Kong, C., Zhang, Y., Dong, Z., Zhu, S., Jiang, H., Shao, Z., Huang, B., and Lu, J. (2012) FOXC1, a target of polycomb, inhibits metastasis of breast cancer cells. *Breast Cancer Res Treat* **131**, 65-73
23. Ray, P. S., Wang, J., Qu, Y., Sim, M. S., Shamonki, J., Bagaria, S. P., Ye, X., Liu, B., Elashoff, D., Hoon, D. S., Walter, M. A., Martens, J. W., Richardson, A. L., Giuliano, A. E., and Cui, X. (2010) FOXC1 is a potential prognostic biomarker with functional significance in basal-like breast cancer. *Cancer Res* **70**, 3870-3876
24. Tkocz, D., Crawford, N. T., Buckley, N. E., Berry, F. B., Kennedy, R. D., Gorski, J. J., Harkin, D. P., and Mullan, P. B. (2012) BRCA1 and GATA3 corepress FOXC1 to inhibit the pathogenesis of basal-like breast cancers. *Oncogene* **31**, 3667-3678
25. Yu, M., Bardia, A., Wittner, B. S., Stott, S. L., Smas, M. E., Ting, D. T., Isakoff, S. J., Ciciliano, J. C., Wells, M. N., Shah, A. M., Concannon, K. F., Donaldson, M. C., Sequist, L. V., Brachtel, E., Sgroi, D., Baselga, J., Ramaswamy, S., Toner, M., Haber, D. A., and Maheswaran, S. (2013) Circulating breast tumor cells exhibit dynamic changes in epithelial and mesenchymal composition. *Science* **339**, 580-584
26. Pan, F., Yao, J., Chen, Y., Zhou, C., Geng, P., Mao, H., and Fang, X. (2014) A novel long non-coding RNA FOXCUT and mRNA FOXC1 pair promote progression and predict poor prognosis in esophageal squamous cell carcinoma. *International journal of clinical and experimental pathology* **7**, 2838-2849
27. van der Heul-Nieuwenhuijsen, L., Dits, N. F., and Jenster, G. (2009) Gene expression of forkhead transcription factors in the normal and diseased human prostate. *BJU Int* **103**, 1574-1580
28. Wang, L., Gu, F., Liu, C. Y., Wang, R. J., Li, J., and Xu, J. Y. (2013) High level of FOXC1 expression is associated with poor prognosis in pancreatic ductal adenocarcinoma. *Tumour Biol* **34**, 853-858
29. Shirakihara, T., Horiguchi, K., Miyazawa, K., Ehata, S., Shibata, T., Morita, I., Miyazono, K., and Saitoh, M. (2011) TGF-beta regulates isoform switching of FGF receptors and epithelial-mesenchymal transition. *Embo j* **30**, 783-795
30. Pierrou, S., Hellqvist, M., Samuelsson, L., Enerback, S., and Carlsson, P. (1994) Cloning and characterization of seven human forkhead proteins: binding site specificity and DNA bending. *Embo J* **13**, 5002-5012

31. Saleem, R. A., Banerjee-Basu, S., Berry, F. B., Baxevanis, A. D., and Walter, M. A. (2001) Analyses of the effects that disease-causing missense mutations have on the structure and function of the winged-helix protein FOXC1. *Am J Hum Genet* **68**, 627-641
32. Xia, L., Huang, W., Tian, D., Zhu, H., Qi, X., Chen, Z., Zhang, Y., Hu, H., Fan, D., Nie, Y., and Wu, K. (2013) Overexpression of forkhead box C1 promotes tumor metastasis and indicates poor prognosis in hepatocellular carcinoma. *Hepatology* **57**, 610-624
33. Sizemore, S. T., and Keri, R. A. (2012) The forkhead box transcription factor FOXC1 promotes breast cancer invasion by inducing matrix metalloprotease 7 (MMP7) expression. *J Biol Chem* **287**, 24631-24640
34. Diepenbruck, M., Waldmeier, L., Ivanek, R., Berninger, P., Arnold, P., van Nimwegen, E., and Christofori, G. (2014) Tead2 expression levels control the subcellular distribution of Yap and Taz, zyxin expression and epithelial-mesenchymal transition. *J Cell Sci* **127**, 1523-1536
35. Aurrand-Lions, M., Johnson-Leger, C., Wong, C., Du Pasquier, L., and Imhof, B. A. (2001) Heterogeneity of endothelial junctions is reflected by differential expression and specific subcellular localization of the three JAM family members. *Blood* **98**, 3699-3707
36. Cheng, T., Roth, B., Choi, W., Black, P. C., Dinney, C., and McConkey, D. J. (2013) Fibroblast growth factor receptors-1 and -3 play distinct roles in the regulation of bladder cancer growth and metastasis: implications for therapeutic targeting. *PLoS One* **8**, e57284
37. Qian, X., Anzovino, A., Kim, S., Suyama, K., Yao, J., Hult, J., Agiostratidou, G., Chandiramani, N., McDaid, H. M., Nagi, C., Cohen, H. W., Phillips, G. R., Norton, L., and Hazan, R. B. (2014) N-cadherin/FGFR promotes metastasis through epithelial-to-mesenchymal transition and stem/progenitor cell-like properties. *Oncogene* **33**, 3411-3421
38. Meng, X., Vander Ark, A., Lee, P., Hostetter, G., Bhowmick, N. A., Matrisian, L. M., Williams, B. O., Miranti, C. K., and Li, X. (2016) Myeloid-specific TGF-beta signaling in bone promotes basic-FGF and breast cancer bone metastasis. *Oncogene* **35**, 2370-2378
39. Wendt, M. K., Taylor, M. A., Schiemann, B. J., Sossey-Alaoui, K., and Schiemann, W. P. (2014) Fibroblast growth factor receptor splice variants are stable markers of oncogenic transforming growth factor beta1 signaling in metastatic breast cancers. *Breast Cancer Res* **16**, R24
40. Mori, S., Kodaira, M., Ito, A., Okazaki, M., Kawaguchi, N., Hamada, Y., Takada, Y., and Matsuura, N. (2015) Enhanced Expression of Integrin alpha v beta 3 Induced by TGF-beta Is Required for the Enhancing Effect of Fibroblast Growth Factor 1 (FGF1) in TGF-beta-Induced Epithelial-Mesenchymal Transition (EMT) in Mammary Epithelial Cells. *PLoS One* **10**, e0137486
41. Acevedo, V. D., Gangula, R. D., Freeman, K. W., Li, R., Zhang, Y., Wang, F., Ayala, G. E., Peterson, L. E., Ittmann, M., and Spencer, D. M. (2007) Inducible FGFR-1 activation leads to irreversible prostate adenocarcinoma and an epithelial-to-mesenchymal transition. *Cancer Cell* **12**, 559-571
42. Strutz, F., Zeisberg, M., Ziyadeh, F. N., Yang, C. Q., Kalluri, R., Muller, G. A., and Neilson, E. G. (2002) Role of basic fibroblast growth factor-2 in epithelial-mesenchymal transformation. *Kidney Int* **61**, 1714-1728
43. Nguyen, P. T., Tsunematsu, T., Yanagisawa, S., Kudo, Y., Miyauchi, M., Kamata, N., and Takata, T. (2013) The FGFR1 inhibitor PD173074 induces mesenchymal-epithelial transition through the transcription factor AP-1. *Br J Cancer* **109**, 2248-2258
44. Andre, F., and Cortes, J. (2015) Rationale for targeting fibroblast growth factor receptor signaling in breast cancer. *Breast Cancer Res Treat* **150**, 1-8

45. Mirzayans, F., Lavy, R., Penner-Chea, J., and Berry, F. B. (2012) Initiation of early osteoblast differentiation events through the direct transcriptional regulation of *Msx2* by *FOXC1*. *PLoS One* **7**, e49095
46. Lambers, E., Arnone, B., Fatima, A., Qin, G., Wasserstrom, J. A., and Kume, T. (2016) *Foxc1* Regulates Early Cardiomyogenesis and Functional Properties of Embryonic Stem Cell Derived Cardiomyocytes. *Stem Cells* **34**, 1487-1500
47. Berry, F. B., Mirzayans, F., and Walter, M. A. (2006) Regulation of *FOXC1* Stability and Transcriptional Activity by an Epidermal Growth Factor-activated Mitogen-activated Protein Kinase Signaling Cascade. *J Biol Chem* **281**, 10098-10104
48. Hopkins, A., Mirzayans, F., and Berry, F. (2016) *Foxc1* Expression in Early Osteogenic Differentiation Is Regulated by BMP4-SMAD Activity. *J Cell Biochem* **117**, 1707-1717

**TABLE 1:** Primers used for qPCR

| Gene           | Forward Primer (5'-3')  | Reverse Primer (5'-3')   |
|----------------|-------------------------|--------------------------|
| Foxc1          | GCTACATCGCTCTTATCACCA   | CCCTGCTTATTGTCCCGATAG    |
| Snail1         | GTCAGCAAAAGCACGGTTG     | CTTGTGTCTGCACGACCT       |
| E-Cadherin     | ACAGCACATATGTAGCTCTCATC | CGTTGTCATTGACGTCTAACAG   |
| N-Cadherin     | GAAGAAGGTGGAGGAGAAGAAG  | TCTAGCCGTCTGATTCCCA      |
| Vimentin       | CCTGAACCTGAGAGAACTAACC  | CATCGTGATGCTGAGAAGTCT    |
| Gapdh          | AATGGTGAAGGTCGGTGTG     | GTGGAGTCATACTGGAACATGTAG |
| Hprt           | CCCCAAAATGGTTAAGGTTGC   | AACAAAGTCTGGCCTGTATC     |
| $\beta$ -actin | GGCTGTATTCCCCTCCATCG    | CCAGTTGGTAACAATGCCATGT   |



**TABLE 2:** Down regulated genes in shFOXC1 cells

| Symbol   | Name                                                               | Fold Change |
|----------|--------------------------------------------------------------------|-------------|
| Usp11    | Ubiquitin Specific Peptidase 11                                    | -4.37597    |
| Slc4a11  | Solute Carrier Family 4 Sodium Bicarbonate Transporter-Like        | -4.25194    |
| Serinc2  | Serine Incorporator 2                                              | -4.22962    |
| Hexa     | Hexosaminidase A (Alpha Polypeptide)                               | -3.8898     |
| Slc7a4   | Solute Carrier Family 7 (Cationic Amino Acid Transporter) Member 4 | -3.27554    |
| Mrc1     | Mannose Receptor, C Type 1                                         | -3.23473    |
| Pdlim1   | PDZ and LIM Domain 1                                               | -3.20693    |
| Gmpr     | Guanosine Monophosphate Reductase                                  | -3.11828    |
| Slc38a1  | Solute Carrier Family 38 Member 1                                  | -3.04469    |
| B4galt4  | UDP-Gal:betaGlcNAc beta 1,4-galactosyltransferase, polypeptide 4   | -3.03515    |
| Cth      | Cystathionase (Cystathionine Gamma-Lyase)                          | -2.95413    |
| Rnase4   | Ribonuclease, RNase A Family 4                                     | -2.93175    |
| Nme4     | NME/NM23 Nucleoside Diphosphate Kinase 4                           | -2.8459     |
| Ckap4    | Cytoskeleton-Associated Protein 4                                  | -2.83377    |
| Hmga1    | High Mobility Group AT-hook 1                                      | -2.80528    |
| Cdhr2    | Cadherin-Related Family Member 2                                   | -2.76103    |
| Pgls     | 6-phosphogluconolactonase                                          | -2.71081    |
| Apoc2    | Apolipoprotein C2                                                  | -2.69018    |
| Prodh    | Proline Dehydrogenase (Oxidase) 1                                  | -2.68539    |
| Lclat1   | Lysocardiophilin Acyltransferase 1                                 | -2.60986    |
| Ptgds    | Prostaglandin D2 Synthase 21 kDa (Brain)                           | -2.5967     |
| Mre11a   | Meiotic Recombination 11 Homology A (S. Cerevisiae)                | -2.59595    |
| Entpd2   | Ectonucleoside Triphosphate Diphosphohydrolase 2                   | -2.54767    |
| Bckdhh   | Branched Chain Keto Acid Dehydrogenase E1, Beta Polypeptide        | -2.53424    |
| Kifc1    | Kinesin Family Member C1                                           | -2.48856    |
| Fgfr1    | Fibroblast Growth Factor Receptor 1                                | -2.47417    |
| Trip13   | Thyroid Hormone Receptor Interactor 13                             | -2.43217    |
| Cxcr7    | (New Term - Akr3) Atypical Chemokine Receptor 3                    | -2.39932    |
| Styk1    | Serine/Threonine/Tyrosine Kinase 1                                 | -2.34711    |
| Ms4a4d   | Membrane-Spanning 4-domains, Subfamily A, Member 4D                | -2.33431    |
| Rbp1     | Retinol Binding Protein 1 Cellular                                 | -2.32398    |
| Jam2     | Junctional Adhesion Molecule 2                                     | -2.26934    |
| Cx3cl1   | Chemokine (C-X3-C Motif) Ligand 1                                  | -2.21326    |
| Gcnt3    | Glucosaminyl (N-acetyl) Transferase 3, Mucin Type                  | -2.20094    |
| Ppp2r2b  | Protein Phosphatase 2, Regulatory Subunit B, Beta                  | -2.19565    |
| Hist1h4d | Histone Cluster 1, H4d                                             | -2.11192    |
| Fam83d   | Family with Sequence Similarity 83, Member D                       | -2.08738    |
| Slc52a3  | solute carrier protein family 52, member 3                         | -2.08703    |
| Birc2    | Baculoviral IAP Repeat Containing 2                                | -2.08159    |
| Ska3     | Spindle and Kinetochore associated Complex Subunit 3               | -2.07294    |
| Arhgdig  | Rho GDP Dissociation Inhibitor (GDI) Gamma                         | -2.067      |
| Krtap1-5 | Keratin Associated Protein 1-5                                     | -2.04865    |
| Lefty1   | Left-Right Determination Factor 1                                  | -2.0382     |
| S100a7a  | S100 Calcium Binding Protein A7A                                   | -2.02576    |

|         |                                                   |          |
|---------|---------------------------------------------------|----------|
| Anln    | Anillin, Actin Binding Protein                    | -2.02446 |
| Kifc5b  | kinesin family member C5B                         | -2.02173 |
| Emp1    | Epithelial Membrane Protein 1                     | -2.01719 |
| Ptpn6   | Protein Tyrosine Phosphatase, Non-Receptor Type 6 | -2.00026 |
| Ube2c   | Ubiquitin-Conjugating Enzyme E2C                  | -1.99385 |
| Bcl2l15 | BCL2-Like 15                                      | -1.97465 |
| Mtfr2   | Mitochondrial Fission Regulator 2                 | -1.96569 |
| Tead2   | TEA Domain Family Member 2                        | -1.9638  |

**TABLE 3:** Genes upregulated in shFOXC1 cells

| Symbol   | Name                                                                     | Fold Change |
|----------|--------------------------------------------------------------------------|-------------|
| Gprc5c   | G Protein-Coupled Receptor, Class C, Group 5, Member C                   | 4.99        |
| Anpep    | Alanyl (Membrane) Aminopeptidase                                         | 3.56        |
| Dapk1    | Death-Associated Protein Kinase 1                                        | 3.47        |
| Nppb     | Natriuretic Peptide B                                                    | 3.17        |
| Trf      | transferrin                                                              | 3.11        |
| C1qtnf6  | C1q And Tumor Necrosis Factor Related Protein 6                          | 2.77        |
| Prr9     | Proline Rich 9                                                           | 2.65        |
| Nudt16   | Nudix (Nucleoside Diphosphate Linked Moiety X)-Type Motif 16             | 2.57        |
| Crp      | C-Reactive Protein, Pentraxin-Related                                    | 2.56        |
| Uts2d    | Urotensin 2B                                                             | 2.55        |
| Acta2    | Actin, Alpha 2, Smooth Muscle, Aorta                                     | 2.53        |
| Ly6a     | lymphocyte antigen 6 complex, locus A                                    | 2.53        |
| Gm9926   | predicted gene 9926                                                      | 2.47        |
| My17     | Myosin, Light Chain 7, Regulatory                                        | 2.44        |
| Lrrc15   | Leucine Rich Repeat Containing 15                                        | 2.44        |
| Alpl     | Alkaline Phosphatase                                                     | 2.40        |
| Abcc2    | ATP-Binding Cassette, Sub-Family C (CFTR/MRP), Member 2                  | 2.32        |
| Steap4   | STEAP (six transmembrane epithelial antigen of prostate) Family Member 4 | 2.23        |
| Krt17    | Keratin 17                                                               | 2.23        |
| Lcp1     | Lymphocyte Cytosolic Protein 1 (L-Plastin)                               | 2.21        |
| Qpct     | Glutamyl-Peptide Cyclotransferase                                        | 2.20        |
| Creb5    | CAMP Responsive Element Binding Protein 5                                | 2.17        |
| Nradd    | neurotrophin receptor associated death domain                            | 2.17        |
| Clmn     | calmin (Calponin-Like, Transmembrane)                                    | 2.14        |
| Tns1     | Tensin 1                                                                 | 2.14        |
| Egr2     | Early Growth Response 2                                                  | 2.13        |
| Clec2e   | C-type lectin domain family 2, member e                                  | 2.11        |
| Gc       | Group-Specific Component (Vitamin D Binding Protein)                     | 2.09        |
| Alox5ap  | Arachidonate 5-Lipoxygenase-Activating Protein                           | 2.08        |
| Tfpi     | Tissue Factor Pathway Inhibitor                                          | 2.03        |
| Tlcd2    | TLC Domain Containing 2                                                  | 1.99        |
| Aqp9     | Aquaporin 9                                                              | 1.98        |
| Gstm2    | Glutathione S-Transferase Mu 2 (Muscle)                                  | 1.96        |
| Gjb5     | Gap Junction Protein, Beta 5, 31.1kDa                                    | 1.95        |
| Stbd1    | Starch Binding Domain 1                                                  | 1.93        |
| Ctla2a   | cytotoxic T lymphocyte-associated protein 2 alpha                        | 1.90        |
| Ly6e     | Lymphocyte Antigen 6 Complex, Locus E                                    | 1.83        |
| Lpin3    | Lipin 3                                                                  | 1.82        |
| Mcam     | Melanoma Cell Adhesion Molecule                                          | 1.78        |
| Crispld2 | Cysteine-Rich Secretory Protein LCCL Domain Containing 2                 | 1.75        |
| Cdh16    | Cadherin 16                                                              | 1.75        |
| Il1rn    | Interleukin 1 Receptor Antagonist                                        | 1.71        |
| Dbh      | Dopamine Beta-Hydroxylase (Dopamine Beta-Monooxygenase)                  | 1.67        |
| Ugt1a7c  | UDP glucuronosyltransferase 1 family, polypeptide A7C                    | 1.65        |

|         |                                                                    |      |
|---------|--------------------------------------------------------------------|------|
| Rab15   | RAB15, Member RAS Oncogene Family                                  | 1.64 |
| Trpa1   | Transient Receptor Potential Cation Channel, Subfamily A, Member 1 | 1.63 |
| Arc     | Activity-Regulated Cytoskeleton-Associated Protein                 | 1.61 |
| Cd40    | CD40 Molecule, TNF Receptor Superfamily Member 5                   | 1.58 |
| Vil1    | Villin 1                                                           | 1.57 |
| Plekhh2 | Pleckstrin Homology Domain Containing, Family H                    | 1.54 |
| Pde8a   | Phosphodiesterase 8A                                               | 1.54 |

## FIGURE LEGENDS

**FIGURE 1.** Foxc1 mRNA expression is elevated in response to TGF- $\beta$ 1 induced EMT in NMuMG cells.

A) NMuMG cells were treated with 5 ng/ml TGF- $\beta$ 1 for 24 hours and the actin cytoskeleton visualized by phalloidin-488 staining. Scale bar 100  $\mu$ m. B) Time course expression analysis of Foxc1, Snail1, Vimentin, E-Cadherin and N-Cadherin expression in NMuMG cells treated with and without 5 ng/ml TGF $\beta$ 1 for the indicated times. Expression was normalized to *Gapdh*,  $\beta$ -actin and *Hprt* mRNA levels and expressed relative to 4 hours untreated samples. Error bars represent the standard deviation of the mean. N=3.

**FIGURE 2.** Reduced Foxc1 levels do not prevent EMT induction. A) NMuMG cells stably expressing shRNA targeting Foxc1 display reduced mRNA expression of Foxc1 compared to the control shEGFP cells. Asterisk indicates  $p < 0.05$ . B) Detection of FOXC1 protein levels by immunoblotting in shEGFP and shFOXC1 cells following 48 hours TGF- $\beta$ 1 treatment. Asterisks denotes a non-specific band detected by the secondary antibody (supplementary Figure 3). C) Expression of epithelial and mesenchymal cell marker genes in shEGFP and shFOXC1 treated with TGF- $\beta$ 1 (5 ng/ml) for 48 hours. Error bars represent standard deviation of the mean. ns-not significant. N=3

**FIGURE 3.** E-cadherin down regulation and actin stress fibre formation in response to TGF $\beta$ 1 treatment occurs in shFOXC1 cells. shEGFP and shFOXC1 cells plated on coverslips were treated with and without TGF- $\beta$ 1 for 24 hours. E-cadherin localization was visualized by indirect immunofluorescence and the actin cytoskeleton was visualized with phalloidin-488. Scale bar 100  $\mu$ m.

**FIGURE 4.** Validation of expression of differentially regulated genes in shFOXC1 cells identified by RNA-seq. Quantitative RT-PCR reactions of genes identified differentially regulated in shFOXC1 cells. RNA was isolated from five independent preparation of cells treated with and without TGF- $\beta$ 1 for 24 hours. Expression was normalized to *Gapdh*,  $\beta$ -actin and *Hprt* mRNA levels and expressed relative to shEGFP untreated samples. Error bars represent standard deviation of the mean. Asterisk indicates  $p < 0.05$ .

**FIGURE 5.** Foxc1 regulates Fgfr1 expression in response to TGF- $\beta$ 1 induced EMT. A) Expression of FGFR1, FGFR2 and  $\alpha$ SMA mRNA following EMT induction by TGF- $\beta$ 1 treatment in shEGFP and shFOXC1 cells. Cells were treated with 5 ng/ml TGF- $\beta$ 1 for 24 hours. Expression was normalized to *Gapdh*,  $\beta$ -actin and *Hprt* mRNA levels and expressed relative to shEGFP untreated samples. Error bars represent standard deviation of the mean. N=5. B) Sequence alignment of the upstream regions of mouse and human Fgfr1 genes. The putative FOXC1 binding sites are indicated in bold. C) and D) Chromatin immunoprecipitation of FOXC1 binding to the upstream regulatory region. Isolated chromatin from TGF- $\beta$ 1 treated NMuMG cells was amplified with primers targeting the upstream regulatory region of *Fgfr1* containing C) the potential FOXC1 binding site or D) the coding region of Fgfr1 gene through quantitative (q) PCR. Values were presented as mean Ct values of three independent ChIP qPCR assays. E) The fold enrichment between  $\alpha$ -FOXC1 ChIP vs. IgG ChIP are compared from the upstream Fgfr1 (5') and the coding sequence (cds) of Fgfr1 qPCR reactions. Asterisk indicates  $p < 0.05$ . ns-not significant.

**FIGURE 6. Foxc1 knockdown reduced TGF- $\beta$ 1 and FGF2 induced invasion.** shEGFP and shFOXC1 NMuMG cells (untreated and treated with TGF $\beta$ 1 and FGF2) were seeded onto serum free Matrigel insert chambers. After 24 hours, migratory cells on the underside of membrane were stained and counted. Asterisk indicates  $p < 0.05$ .



A

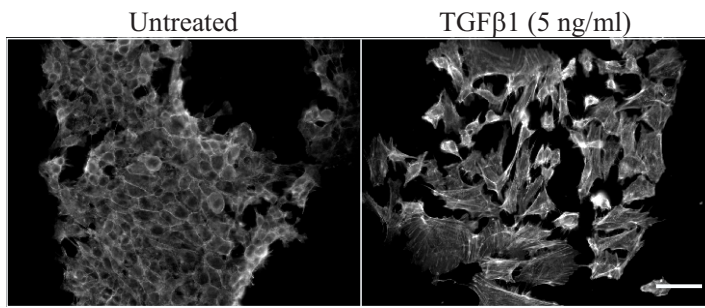

B

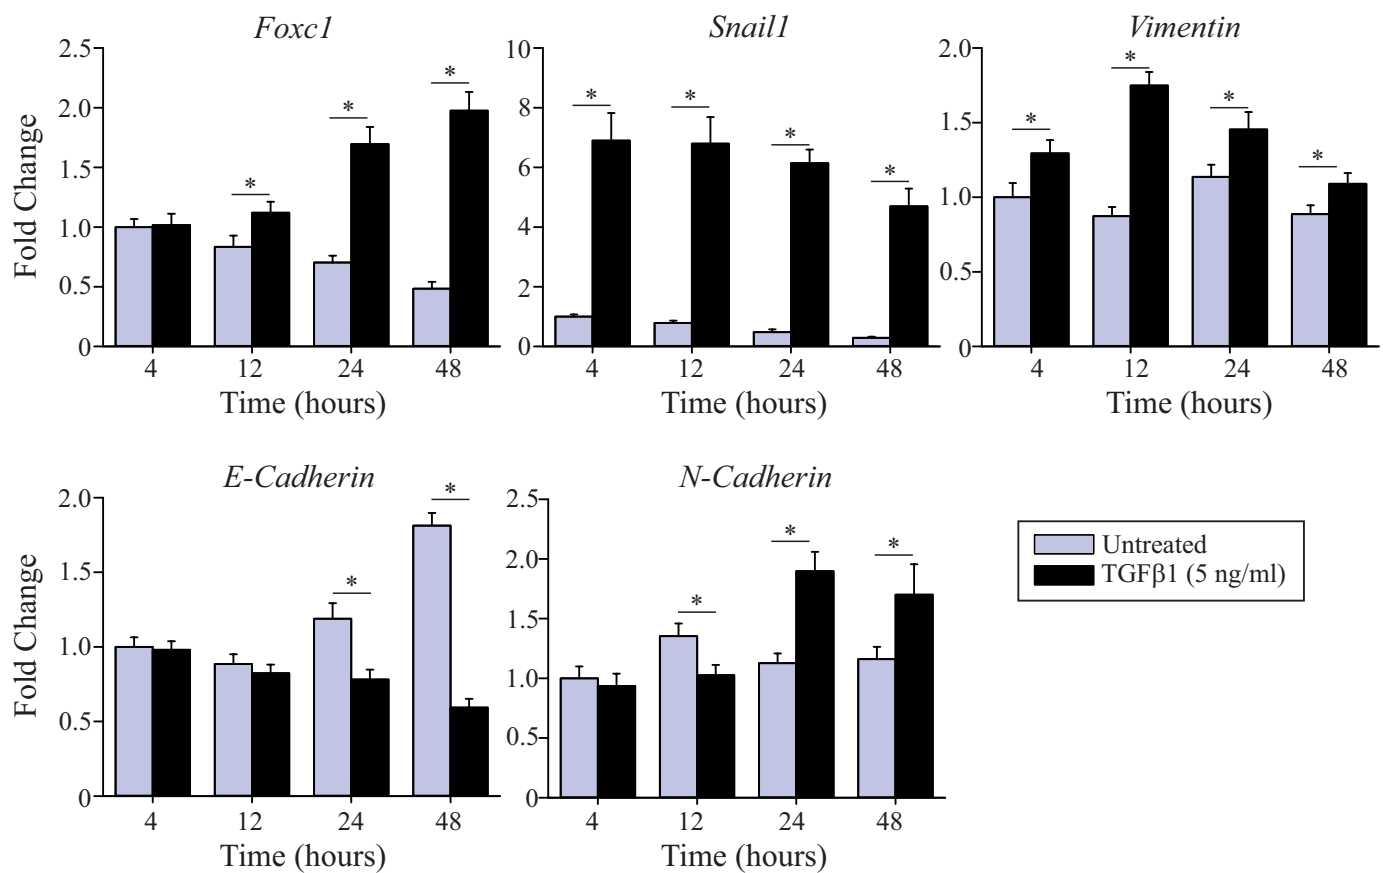

Figure 1

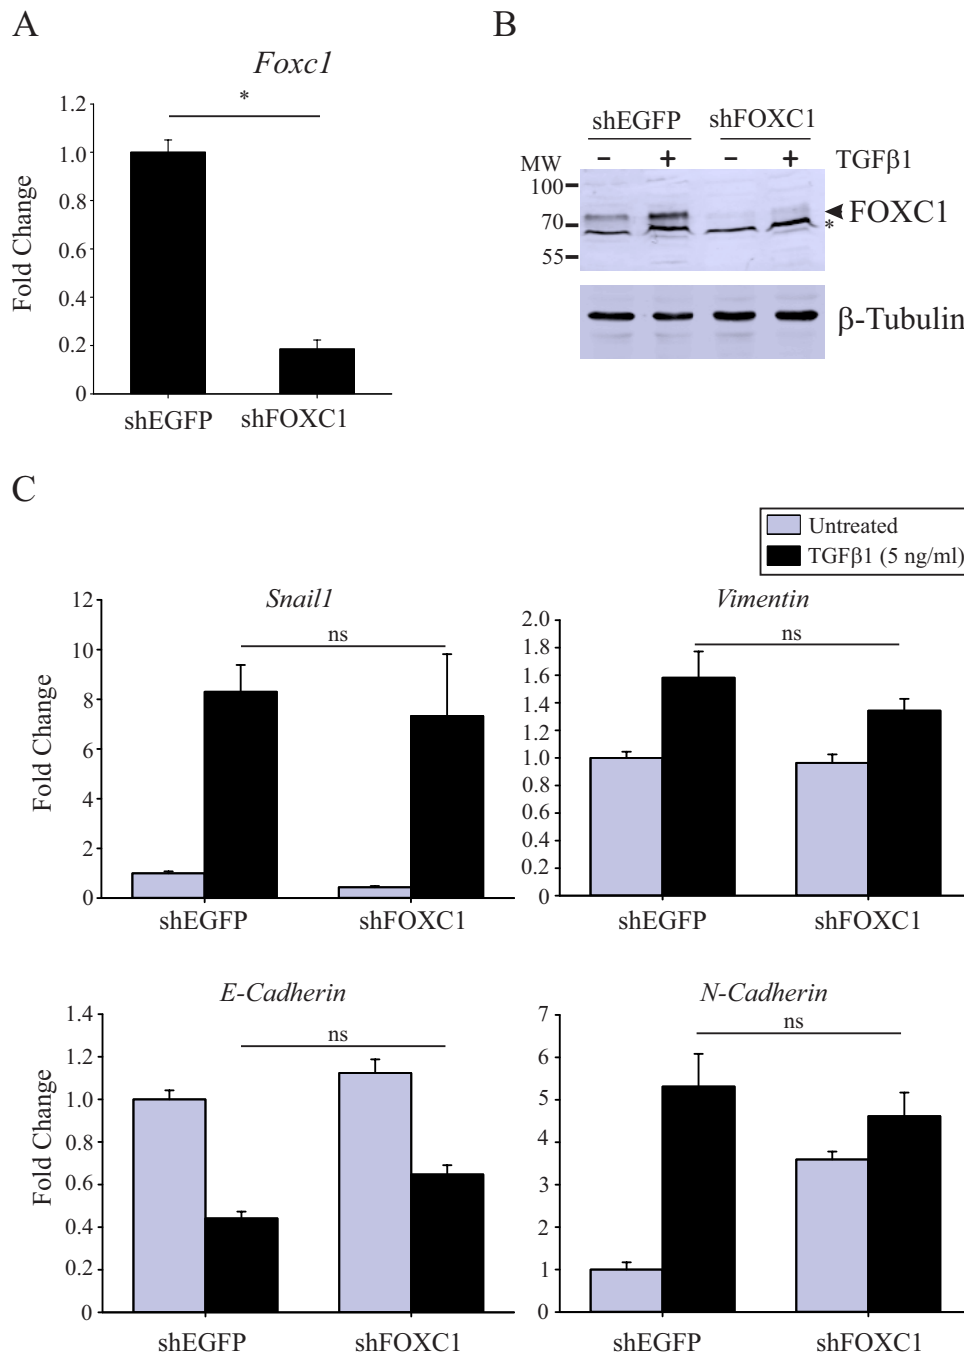

Figure 2

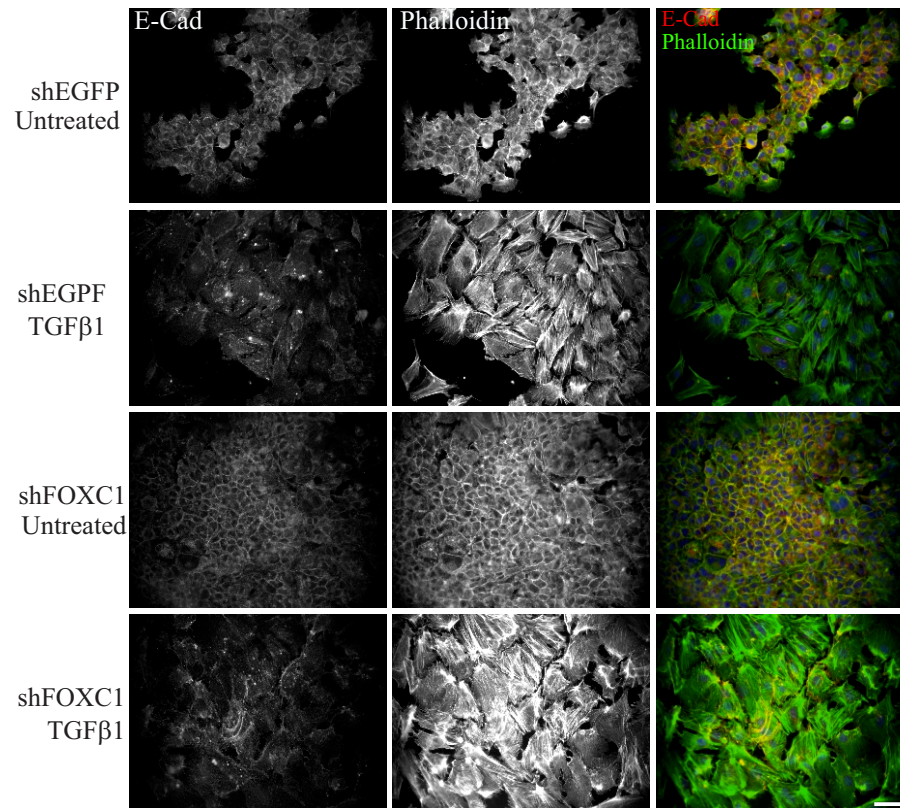

Figure 3

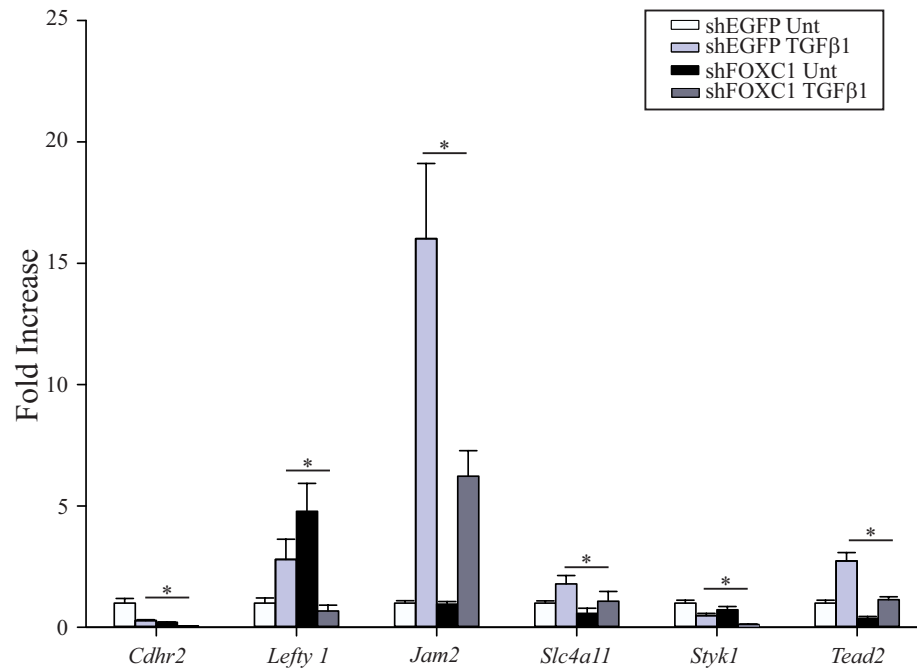

Figure 4

A.

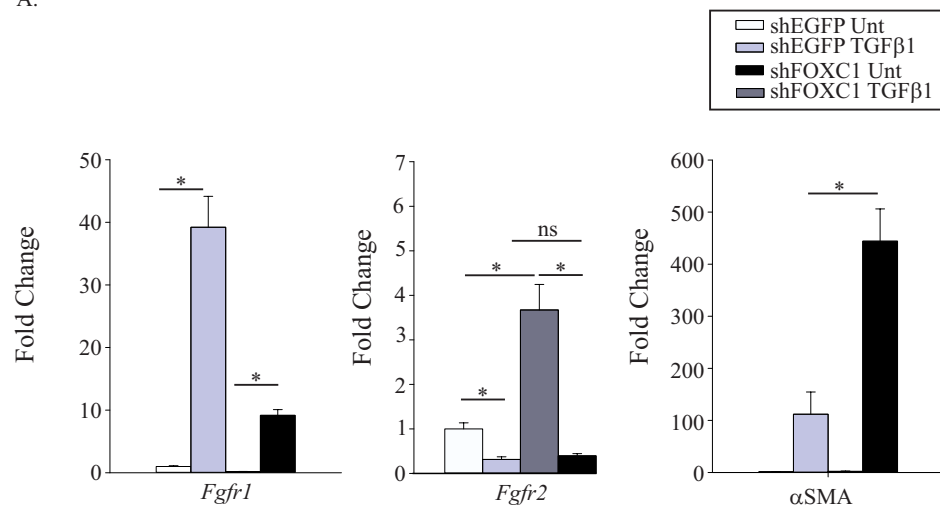

B.

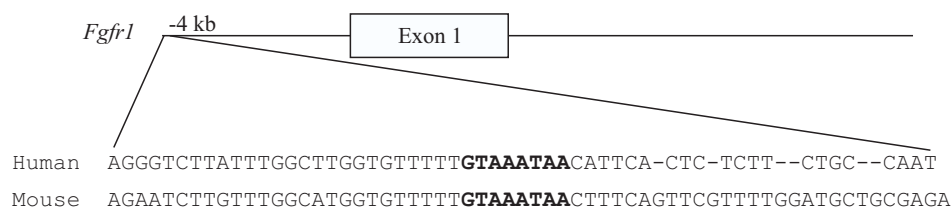

C.

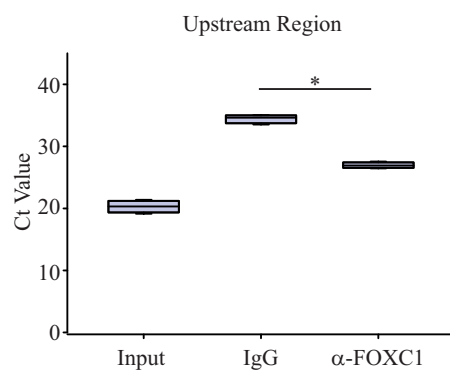

D.

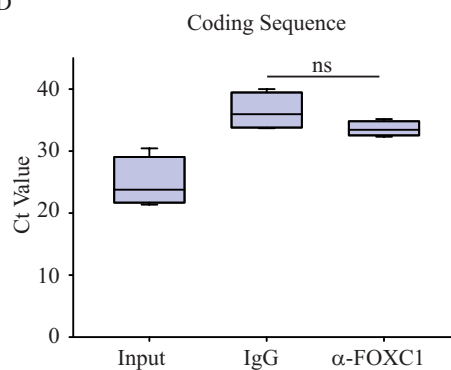

E.

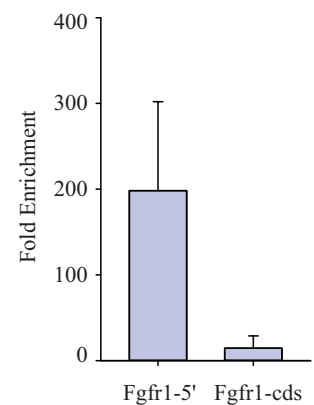

Figure 5



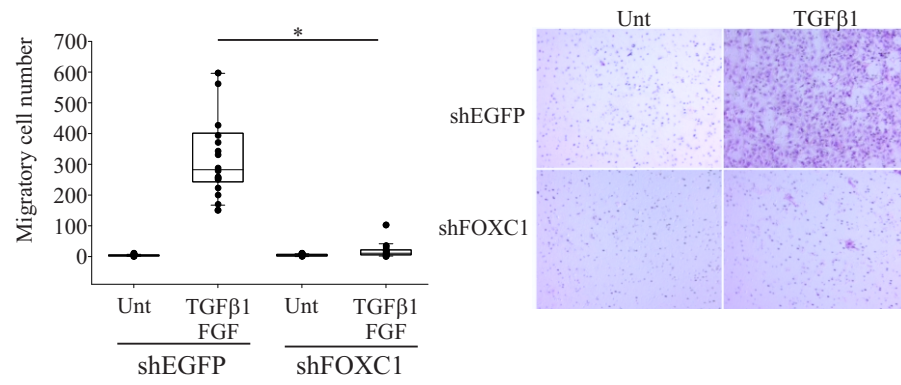

Figure 6
